# Supplementary material for: Postpartum Plasma-Derived Exosomes Confer Mitochondrial Stabilization and Neuroprotection against Ischemic Stroke
Source: Research Square preprint supplement (doi:10.21203/rs.3.rs-9573067/v1), 2026-05-27
Supplement: Supplementary file 1 [file 21b0824815c4023301e1e79a.docx]

**
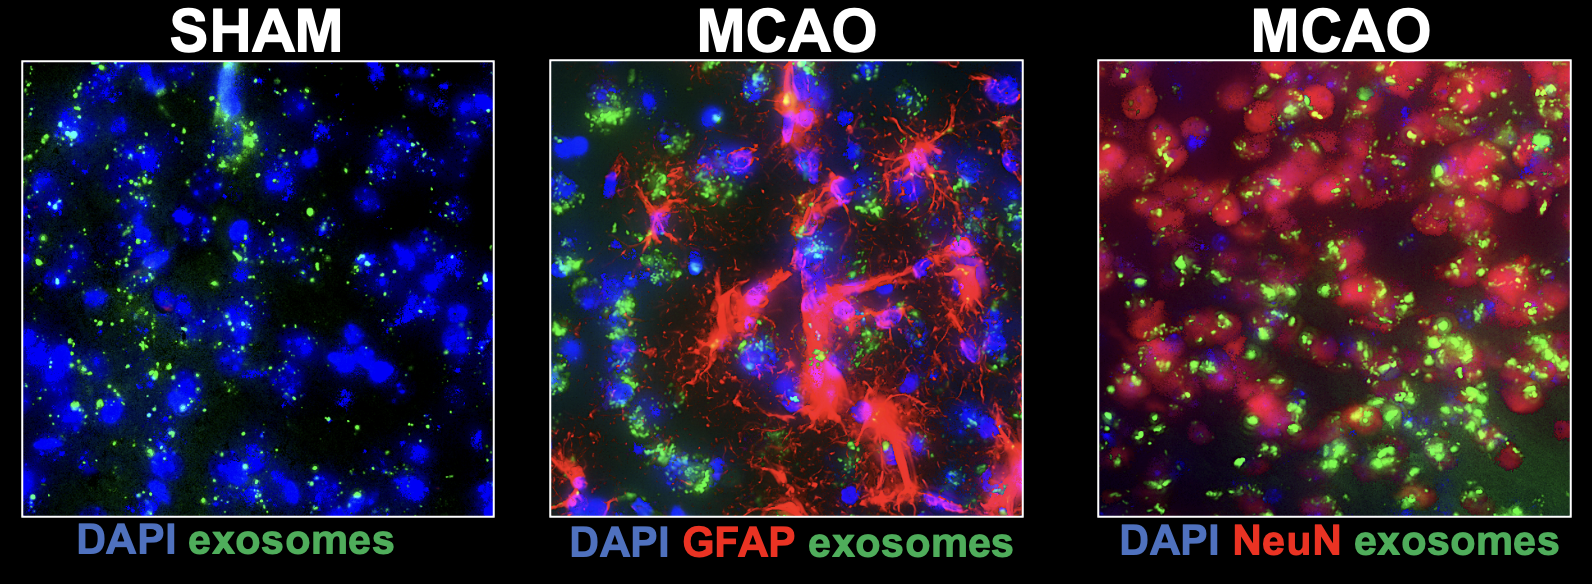
**

**Figure S1.** Examples of images demonstrating tracking of green fluorescent-protein-labeled exosomes after intracerebroventricular injection in mice subjected to either middle cerebral artery occlusion or sham control surgery. Tissue is co-labeled to identify astrocytes (GFAP) and neurons (NeuN). Scale bar = 50 mm
